# Supplementary material
Source: publisher figshare collection journal article supplement (https://gsapubs.figshare.com/articles/dataset/_/23154140)
Supplement: Supplementary file 1 [file 2]

Xia, T., Liang, X., Wang, C., Liang, X., and Shan, Y., 2023, U-Pb and Re-Os geochronology and geochemistry of the Ulgen hidden porphyry Mo deposit in the Derbugan metallogenic belt (NE China): Insights into petrogenesis and tectonic setting: GSA Bulletin, <https://doi.org/10.1130/B36697.1>.

## Supplemental Material

**Table S1.** Lithology, occurrences, and locations of samples selected for zircon U-Pb, molybdenite Re-Os, whole-rock major- and trace-element analysis, zircon Hf, and Sr-Nd-Pb isotope analysis.

**Table S2.** Zircon LA-ICP-MS U-Pb data of the granitoids.

**Table S3.** Re-Os data of molybdenite from the Ulgen porphyry Mo deposit.

**Table S4.** Whole-rock major- and trace-element compositions of the monzogranitic porphyry, muscovite monzonitic granite, and biotite granitic porphyry.

**Table S5.** Sr-Nd-Pb isotopic compositions of the granitoids in the Ulgen deposit.

**Table S6.** Zircon Lu-Hf isotopic composition of the granitoids.

**Table S7.** Trace-element (ppm) data of zircon grains from the granitoids.
