# Supplementary material
Source: publisher figshare collection journal article supplement (https://gsapubs.figshare.com/articles/dataset/_/23154140)
Supplement: Supplementary file 1 [file 2]

## Sheet: Sheet1
TABLE S2. Zircon LA-ICP-MS U-Pb data of the granitoids
Spot NO.	Isotopic ratio							Ages
								(Ma)
	207Pb/206Pb	±1σ	207Pb/235U	±1σ	206Pb/238U	±1σ		207Pb/206Pb	±1σ	207Pb/235U	±1σ	206Pb/238U	±1σ	Concordance
ZKI07-01 MP [ 120° 27′23＂，50° 22′47＂]
ZKI07-01-01	0.04865	0.00116	0.16925	0.00388	0.02525	0.00025		130.9	55.21	158.8	3.37	160.8	1.58	0.94
ZKI07-01-02	0.04796	0.00184	0.16222	0.00605	0.02455	0.00029		96.2	89.58	152.6	5.29	156.3	1.84	0.93
ZKI07-01-03	0.0498	0.00153	0.17155	0.0051	0.025	0.00027		185.7	69.96	160.8	4.42	159.2	1.7	0.96
ZKI07-01-04	0.0529	0.0029	0.18847	0.01005	0.02586	0.00039		324.4	119.65	175.3	8.59	164.6	2.43	0.73
ZKI07-01-05	0.04608	0.0025	0.15876	0.00841	0.025	0.00036		1.8	125.81	149.6	7.37	159.2	2.23	0.93
ZKI07-01-06	0.04757	0.00252	0.16491	0.0085	0.02516	0.00036		77.1	121.88	155	7.41	160.2	2.25	0.98
ZKI07-01-07	0.05065	0.00133	0.1746	0.00441	0.02502	0.00026		225	59.51	163.4	3.81	159.3	1.62	0.97
ZKI07-01-08	0.04697	0.00129	0.16516	0.00439	0.02552	0.00026		47.6	64.75	155.2	3.82	162.4	1.66	0.95
ZKI07-01-09	0.05017	0.00148	0.17445	0.00498	0.02524	0.00027		202.8	67.24	163.3	4.31	160.7	1.7	0.94
ZKI07-01-10	0.04871	0.00136	0.16449	0.00443	0.02451	0.00026		133.7	64.34	154.6	3.86	154.6	2.02	0.77
ZKI07-01-11	0.04894	0.00086	0.16908	0.0028	0.02507	0.00023		145	40.6	158.6	2.43	159.6	1.47	0.98
ZKI07-01-12	0.04937	0.00123	0.16959	0.00408	0.02493	0.00025		165.4	57.4	159.1	3.54	158.7	1.59	0.95
ZKI07-01-13	0.0507	0.00093	0.17227	0.00299	0.02466	0.00023		227	41.72	161.4	2.59	157.1	1.46	0.94
ZKI07-01-14	0.05053	0.00095	0.17296	0.00309	0.02484	0.00024		219.4	42.96	162	2.68	158.2	1.48	0.95
ZKI07-01-15	0.04689	0.00115	0.15964	0.00377	0.02471	0.00025		43.4	57.96	150.4	3.3	157.3	1.55	0.93
ZKI07-01-16	0.052	0.00156	0.18499	0.00535	0.02582	0.00028		285.6	66.98	172.3	4.58	164.3	1.76	0.98
ZKI07-01-17	0.0492	0.00187	0.17106	0.00633	0.02523	0.0003		157.4	86.8	160.3	5.49	160.6	1.88	0.99
ZKI07-01-18	0.04899	0.00178	0.17205	0.00608	0.02549	0.0003		147.6	83.21	161.2	5.27	162.2	1.86	0.96
ZKI06-02 MMG [ 120° 27′23＂，50° 22′47＂]
ZKI06-02-01	0.0514628	0.00160729	0.162482	0.00519849	0.0228492	0.000274712		261.175	72.21	152.874	4.54187	145.638	1.73313	0.95
ZKI06-02-02	0.0503204	0.00155396	0.158921	0.00502738	0.0229237	0.000282799		209.33	39.8075	149.758	4.40589	146.107	1.78393	0.97
ZKI06-02-03	0.0530676	0.00231771	0.165895	0.00742372	0.022632	0.000296918		331.54	99.99	155.85	6.46623	144.269	1.87332	0.92
ZKI06-02-04	0.0535718	0.00155182	0.171842	0.00554624	0.0231129	0.000315203		353.76	64.8075	161.016	4.80698	147.299	1.98762	0.91
ZKI06-02-05	0.0502196	0.00158817	0.158116	0.00528468	0.02291	0.000352376		205.63	72.21	149.053	4.63447	146.021	2.22208	0.97
ZKI06-02-06	0.0483689	0.00147099	0.152386	0.00467323	0.0228778	0.000250697		116.755	72.215	144.017	4.11881	145.818	1.58191	0.98
ZKI06-02-07	0.0528708	0.00185884	0.165438	0.0053637	0.023014	0.000310493		324.13	112.025	155.452	4.6743	146.676	1.95814	0.94
ZKI06-02-08	0.0519017	0.00185848	0.157455	0.00549727	0.02228	0.000298061		279.69	81.4675	148.473	4.82357	142.049	1.88111	0.95
ZKI06-02-09	0.0525217	0.00155399	0.161792	0.00484719	0.0222932	0.000229909		309.32	68.5125	152.27	4.23761	142.133	1.4518	0.93
ZKI06-02-10	0.0487725	0.00123718	0.15611	0.0040993	0.0232591	0.000288972		200.075	59.2525	147.292	3.60171	148.221	1.82225	0.99
ZKI06-02-11	0.0482388	0.00145319	0.146181	0.00425613	0.0220308	0.000250962		109.35	74.9925	138.534	3.77161	140.478	1.58475	0.98
ZKI06-02-12	0.0520463	0.00200318	0.169028	0.00650161	0.0237178	0.00034368		287.1	87.0225	158.575	5.64813	151.11	2.16571	0.95
ZKI06-02-13	0.0536072	0.00169654	0.166104	0.00559086	0.0223126	0.000265303		353.76	76.845	156.032	4.86939	142.255	1.67469	0.9
ZKI06-02-14	0.0500198	0.00233524	0.157246	0.00788729	0.0229385	0.000434282		194.525	109.243	148.29	6.92115	146.201	2.73792	0.98
ZKI06-02-15	0.0526328	0.00153816	0.162051	0.00472918	0.0223991	0.000267249		322.28	66.66	152.497	4.13359	142.801	1.68682	0.93
ZKI06-02-16	0.0513235	0.00179437	0.165254	0.00670935	0.0231246	0.000309898		253.77	86.0975	155.291	5.84737	147.373	1.9542	0.94
ZKI06-02-17	0.0489741	0.0011209	0.156815	0.00389542	0.0231745	0.000262726		146.38	49.07	147.911	3.42064	147.688	1.6572	0.99
ZKI06-02-18	0.0537114	0.00214219	0.16492	0.00736984	0.0221471	0.000320561		366.72	95.36	155.001	6.42466	141.212	2.02313	0.9
ZKI06-02-19	0.0605302	0.00467879	0.199342	0.0182095	0.022827	0.000483007		633.35	162.785	184.569	15.417	145.498	3.04519	0.76
ZKI06-02-20	0.0612915	0.0024346	0.186765	0.00767714	0.0220595	0.000279232		650.015	85.1725	173.865	6.56954	140.659	1.76283	0.78
ZKI07-06 BGP [ 120° 27′2＂，50° 22′10＂]
ZKI07-06-01	0.0506657	0.0018211	0.157342	0.00541123	0.0227249	0.000283162		233.4	83.32	148.374	4.74856	144.855	1.78654	0.97
ZKI07-06-02	0.0536377	0.00371028	0.162623	0.0107192	0.0219178	0.000423894		366.72	157.387	152.997	9.36227	139.765	2.67505	0.95
ZKI07-06-03	0.0550848	0.00147416	0.167826	0.00371944	0.0224225	0.000234353		416.715	61.105	157.531	3.2357	142.948	1.47962	0.9
ZKI07-06-04	0.0539236	0.00123238	0.163571	0.00416232	0.0219248	0.000305268		368.57	49.995	153.824	3.63373	139.809	1.92714	0.97
ZKI07-06-05	0.050342	0.00135571	0.159186	0.0042087	0.022948	0.000249441		209.33	62.9525	149.991	3.688	146.26	1.57391	0.98
ZKI07-06-06	0.055986	0.00202921	0.173985	0.00631451	0.0226592	0.000303284		450.045	81.475	162.871	5.46256	144.441	1.91337	0.95
ZKI07-06-07	0.053242	0.00256759	0.16944	0.00798694	0.0232376	0.00033859		338.945	111.1	158.933	6.93562	148.085	2.13462	0.94
ZKI07-06-08	0.0549279	0.00308219	0.17175	0.00943855	0.0230914	0.000389288		409.31	125.915	160.936	8.17974	147.164	2.45416	0.93
ZKI07-06-09	0.0517344	0.00232315	0.164335	0.0069507	0.02332	0.000329245		272.285	101.837	154.49	6.06242	148.604	2.07563	0.91
ZKI07-06-10	0.053104	0.00237725	0.167904	0.00763111	0.0228551	0.000328745		331.54	101.842	157.598	6.6354	145.675	2.07337	0.93
